# Supplementary material
Source: PubMed Central journal article supplement (PMC9176155)
Supplement: 41415_2022_4340_MOESM1_ESM.pdf [file 41415_2022_4340_MOESM1_ESM.pdf]

## Supplementary File 1. Interview guide

- Current role
- Overarching responsibilities and in what aspect you work with asylum seekers and refugees (ASRs).
- Is this role full-time or part time? How long have you been in this role?
- Do you/have you worked with both asylum seekers and refugees?
- Do you think oral health is important/valued among this population and if yes, in what aspect?
- Do you have any experience of working with ASRs on advising on their oral health and access to services?

### Oral hygiene

- Can you tell me about any barriers that exist among ASRs to having good oral health habits (in terms of tooth brushing, diet, smoking)?
- Can you tell me about ways we can help ASRs look after their own teeth?

### Dental care access

- In your experience, what is the main reason for ASRs to seek dental care?
- Do the people you work with report problems with access to dental care and experience of dental visit?
- Can you tell me about any barriers that exist for ASRs to accessing dental services?
- What are the difficulties that dentists may encounter in terms of care provision towards ASRs?
- How we can facilitate better dental care access and provision for this population? What an ideal service should run like?
- Do you think ASRs are best treated in dedicated dental clinics or by an NHS dentist and why?
- What personal qualities should dentists have?
- Anything else to add?
